# Supplementary material
Source: PubMed Central journal article supplement (PMC2945214)
Supplement: NIHMS231960-supplement-1_si_001.pdf [file NIHMS231960-supplement-1_si_001.pdf]

## Supporting Information

### Antitumor Agents 280. Multidrug Resistance-Selective Desmosdomotin B Analogous

Kyoko Nakagawa-Goto,<sup>a,\*</sup> Po-Cheng Chang,<sup>a†</sup> Chin-Yu Lai,<sup>a†</sup> Hsin-Yi Hung,<sup>a</sup> Tzu-Hsuan Chen,<sup>a</sup> Pei-Chi Wu,<sup>a</sup> Hao Zhu,<sup>b</sup> Alexander Sedykh,<sup>b</sup> Kenneth F. Bastow,<sup>c,\*</sup> and Kuo-Hsiung Lee,<sup>a,d,\*</sup>

<sup>a</sup> *Natural Products Research Laboratories, Eshelman School of Pharmacy, University of North Carolina at Chapel Hill, Chapel Hill, North Carolina 27599, USA*

<sup>b</sup> *Laboratory for Molecular Modeling, Division of Medicinal Chemistry and Natural Products, Eshelman School of Pharmacy, University of North Carolina at Chapel Hill, Chapel Hill, North Carolina 27599*

<sup>c</sup> *Division of Medicinal Chemistry & Natural Products, Eshelman School of Pharmacy, University of North Carolina at Chapel Hill, Chapel Hill, North Carolina 27599, USA*

<sup>d</sup> *Chinese Medicine Research and Development Center, China Medical University, Taichung, Taiwan*

#### Table of Contents

|                                                                  |     |
|------------------------------------------------------------------|-----|
| Physical data of <b>6–19, 21–26, 28, 30–34, 36–48, and 50–55</b> | S2  |
| Table of the analytical data                                     | S10 |

**Physical data of 6–19, 21–26, 28, 30–34, 36–48, and 50–55**

**4'-iso-Propyl-6,8,8-triethyldesmosdumotin B (6).** Pale yellow prisms, mp 186-187 °C (EtOAc-hexane). <sup>1</sup>H NMR (300 MHz, CDCl<sub>3</sub>): δ 13.13 (s, 1H, 5-OH), 7.73 (d, 2H, *J* = 8.2 Hz, Ar-*H*), 7.42 (d, 2H, *J* = 8.2 Hz, Ar-*H*), 6.87 (s, 1H, 3-*H*), 2.45 (q, 2H, *J* = 7.3 Hz, 6-CH<sub>2</sub>CH<sub>3</sub>), 2.32-2.19 (m, 2H, 8-CH<sub>2</sub>CH<sub>3</sub>), 2.06-1.92 (m, 2H, 8-CH<sub>2</sub>CH<sub>3</sub>), 1.57 [s, 1H, 4'-CH(CH<sub>3</sub>)<sub>2</sub>], 1.31 and 1.29 [s, 3H each, 4'-CH(CH<sub>3</sub>)<sub>2</sub>], 1.04 (t, 3H, *J* = 7.4 Hz, 6-CH<sub>2</sub>CH<sub>3</sub>), 0.67 (t, 6H, *J* = 7.3 Hz, 8-CH<sub>2</sub>CH<sub>3</sub>). MS (ESI<sup>+</sup>) *m/z*: 381 (M<sup>+</sup>+1). Anal. (C<sub>24</sub>H<sub>28</sub>O<sub>4</sub>) C, H, O.

**4'-Butyl-6,8,8-triethyldesmosdumotin B (7).** Pale yellow prisms, mp 165-166 °C (EtOAc-hexane). <sup>1</sup>H NMR (300 MHz, CDCl<sub>3</sub>): δ 13.14 (s, 1H, 5-OH), 7.71 (d, 2H, *J* = 8.2 Hz, Ar-*H*), 7.37 (d, 2H, *J* = 8.2 Hz, Ar-*H*), 6.87 (s, 1H, 3-*H*), 2.71 [t, 2H, *J* = 7.8 Hz, 4'-CH<sub>2</sub>(CH<sub>2</sub>)<sub>2</sub>CH<sub>3</sub>], 2.45 (q, 2H, *J* = 7.3 Hz, 6-CH<sub>2</sub>CH<sub>3</sub>), 2.33-2.18 (m, 2H, 8-CH<sub>2</sub>CH<sub>3</sub>), 2.08-1.92 (m, 2H, 8-CH<sub>2</sub>CH<sub>3</sub>), 1.71-1.58 (m, 2H, 4'-CH<sub>2</sub>CH<sub>2</sub>CH<sub>2</sub>CH<sub>3</sub>), 1.46-1.30 [m, 2H, 4'-(CH<sub>2</sub>)<sub>2</sub>CH<sub>2</sub>CH<sub>3</sub>], 1.04 (t, 3H, *J* = 7.3 Hz, 6-CH<sub>2</sub>CH<sub>3</sub>), 0.95 [t, 3H, *J* = 7.8 Hz, 4'-(CH<sub>2</sub>)<sub>3</sub>CH<sub>3</sub>], 0.67 (t, 6H, *J* = 7.3 Hz, 8-CH<sub>2</sub>CH<sub>3</sub>). MS (ESI<sup>+</sup>) *m/z*: 395 (M<sup>+</sup>+1). Anal. (C<sub>25</sub>H<sub>30</sub>O<sub>4</sub>) C, H, O.

**4'-tert-Butyl-6,8,8-triethyldesmosdumotin B (8).** Pale yellow prisms, mp 222-223 °C (EtOAc-hexane). <sup>1</sup>H NMR (300 MHz, CDCl<sub>3</sub>): δ 13.13 (s, 1H, 5-OH), 7.75 (d, 2H, *J* = 8.7 Hz, Ar-*H*), 7.58 (d, 2H, *J* = 8.7 Hz, Ar-*H*), 6.88 (s, 1H, 3-*H*), 2.45 (q, 2H, *J* = 7.3 Hz, 6-CH<sub>2</sub>CH<sub>3</sub>), 2.32-1.98 (m, 2H, 8-CH<sub>2</sub>CH<sub>3</sub>), 2.06-1.92 (m, 2H, 8-CH<sub>2</sub>CH<sub>3</sub>), 1.37 [s, 9H, 4'-CH(CH<sub>3</sub>)<sub>3</sub>], 1.04 (t, 3H, *J* = 7.3 Hz, 6-CH<sub>2</sub>CH<sub>3</sub>), 0.67 (t, 6H, *J* = 7.3 Hz, 8-CH<sub>2</sub>CH<sub>3</sub>). MS (ESI<sup>+</sup>) *m/z*: 395 (M<sup>+</sup>+1). Anal. (C<sub>25</sub>H<sub>30</sub>O<sub>4</sub>·1/8H<sub>2</sub>O) C, H, O.

**6,8,8-Triethyl-4'-trifluoromethyldesmosdumotin B (9).** Pale yellow prisms, mp 168-169 °C (EtOAc-hexane). <sup>1</sup>H NMR (300 MHz, CDCl<sub>3</sub>): δ 12.82 (s, 1H, 5-OH), 7.93 (d, 2H, *J* = 8.2 Hz, Ar-*H*), 7.84 (d, 2H, *J* = 8.2 Hz, Ar-*H*), 6.97 (s, 1H, 3-*H*), 2.46 (q, 2H, *J* = 7.3 Hz, 6-CH<sub>2</sub>CH<sub>3</sub>), 2.26-2.21 (m, 2H, 8-CH<sub>2</sub>CH<sub>3</sub>), 2.04-1.92 (m, 2H, 8-CH<sub>2</sub>CH<sub>3</sub>), 1.05 (t, 3H, *J* = 7.3 Hz, 6-CH<sub>2</sub>CH<sub>3</sub>), 0.68 (t, 6H, *J* = 7.3 Hz, 8-CH<sub>2</sub>CH<sub>3</sub>). MS (ESI<sup>+</sup>) *m/z*: 407 (M<sup>+</sup>+1). Anal. (C<sub>22</sub>H<sub>21</sub>F<sub>3</sub>O<sub>4</sub>) C, H, O.

**4'-Hydroxy-6,8,8-triethyldesmosdumotin B (10).** Pale yellow prisms, mp 213-214 °C (EtOAc-hexane). <sup>1</sup>H NMR (300 MHz, DMSO-d<sub>6</sub>): δ 13.80 (br s, 1H, 5-OH), 10.50 (br s, 1H, 4'-OH), 7.93 (d, 2H, *J* = 9.0 Hz, Ar-*H*), 7.25 (s, 1H, 3-*H*), 2.30 (q, 2H, *J* = 7.4 Hz, 6-CH<sub>2</sub>CH<sub>3</sub>), 2.10-1.97 (m, 4H, 8-CH<sub>2</sub>CH<sub>3</sub>), 0.93 (t, 3H, *J* = 7.4 Hz, 6-CH<sub>2</sub>CH<sub>3</sub>), 0.58 (t, 6H, *J* = 7.4 Hz, 8-CH<sub>2</sub>CH<sub>3</sub>). MS (ESI<sup>+</sup>) *m/z*: 355 (M<sup>+</sup>+1). Anal. (C<sub>21</sub>H<sub>22</sub>O<sub>5</sub>) C, H, O.

**4'-Methoxy-6,8,8-triethyldesmosdumotin B (11).** Pale yellow prisms, mp 139-140 °C (EtOAc-hexane). <sup>1</sup>H NMR (300 MHz, CDCl<sub>3</sub>): δ 13.21 (s, 1H, 5-OH), 7.79-7.72 (m, 2H, Ar-*H*), 7.10-7.02 (m, 2H, Ar-*H*), 6.80 (s, 1H, 3-*H*), 3.91 (s, 3H, 4'-OCH<sub>3</sub>), 2.45 (q, 2H, *J* = 7.3 Hz, 6-CH<sub>2</sub>CH<sub>3</sub>), 2.34-2.18

(m, 2H, 8-CH<sub>2</sub>CH<sub>3</sub>), 2.05-1.90 (m, 2H, 8-CH<sub>2</sub>CH<sub>3</sub>), 1.04 (t, 3H, *J* = 7.3 Hz, 6-CH<sub>2</sub>CH<sub>3</sub>), 0.67 (t, 3H, *J* = 7.3 Hz, 8-CH<sub>2</sub>CH<sub>3</sub>). MS (ESI<sup>+</sup>) *m/z*: 369 (M<sup>+</sup>+1). Anal. (C<sub>22</sub>H<sub>24</sub>O<sub>5</sub>) C, H, O.

**4'-Ethoxy-6,8,8-triethyl-desmosdumotin B (12).** Pale yellow prisms, mp 161-162 °C (EtOAc-hexane). <sup>1</sup>H NMR (300 MHz, CDCl<sub>3</sub>): δ 13.22 (s, 1H, 5-OH), 7.74 (dt, 2H, *J* = 8.7 and 1.8 Hz, Ar-*H*), 7.03 (dt, 2H, *J* = 8.7 and 1.8 Hz, Ar-*H*), 6.79 (s, 1H, 3-*H*), 4.13 (q, 2H, *J* = 6.9 Hz, 4'-OCH<sub>2</sub>CH<sub>3</sub>), 2.45 (q, 2H, *J* = 7.3 Hz, 6-CH<sub>2</sub>CH<sub>3</sub>), 2.32-2.18 (m, 2H, 8-CH<sub>2</sub>CH<sub>3</sub>), 2.06-1.91 (m, 2H, 8-CH<sub>2</sub>CH<sub>3</sub>), 1.48 (t, 3H, *J* = 6.9 Hz, 4'-OCH<sub>2</sub>CH<sub>3</sub>), 1.04 (t, 3H, *J* = 7.3 Hz, 6-CH<sub>2</sub>CH<sub>3</sub>), 0.67 (t, 3H, *J* = 7.3 Hz, 8-CH<sub>2</sub>CH<sub>3</sub>). MS (ESI<sup>+</sup>) *m/z*: 383 (M<sup>+</sup>+1). Anal. (C<sub>23</sub>H<sub>26</sub>O<sub>5</sub>·1/8H<sub>2</sub>O) C, H, O.

**4'-Propoxy-6,8,8-triethyl-desmosdumotin B (13).** Pale yellow prisms, mp 162-163 °C (EtOAc-hexane). <sup>1</sup>H NMR (300 MHz, CDCl<sub>3</sub>): δ 13.22 (s, 1H, 5-OH), 7.73 (d, 2H, *J* = 9.2 Hz, Ar-*H*), 7.03 (d, 2H, *J* = 9.2 Hz, Ar-*H*), 6.79 (s, 1H, 3-*H*), 4.01 (t, 2H, *J* = 6.4 Hz, 4'-OCH<sub>2</sub>CH<sub>2</sub>CH<sub>3</sub>), 2.45 (q, 2H, *J* = 7.3 Hz, 6-CH<sub>2</sub>CH<sub>3</sub>), 2.12-2.18 (m, 2H, 8-CH<sub>2</sub>CH<sub>3</sub>), 2.06-1.79 (m, 4H, 8-CH<sub>2</sub>CH<sub>3</sub> and 4'-OCH<sub>2</sub>CH<sub>2</sub>CH<sub>3</sub>), 1.07 (t, 3H, *J* = 7.3 Hz, 4'-OCH<sub>2</sub>CH<sub>2</sub>CH<sub>3</sub>), 1.04 (t, 3H, *J* = 7.3 Hz, 6-CH<sub>2</sub>CH<sub>3</sub>), 0.67 (t, 3H, *J* = 7.3 Hz, 8-CH<sub>2</sub>CH<sub>3</sub>). MS (ESI<sup>+</sup>) *m/z*: 397 (M<sup>+</sup>+1). Anal. (C<sub>24</sub>H<sub>28</sub>O<sub>5</sub>) C, H, O.

**4'-Trifluoromethoxy-6,8,8-triethyl-desmosdumotin B (14).** Pale yellow prisms, mp 157-158 °C (EtOAc-hexane). <sup>1</sup>H NMR (300 MHz, CDCl<sub>3</sub>): δ 12.91 (s, 1H, 5-OH), 7.88-7.81 (m, 2H, Ar-*H*), 7.42 (br d, 2H, *J* = 8.7 Hz, Ar-*H*), 6.89 (s, 1H, 3-*H*), 2.46 (q, 2H, *J* = 7.4 Hz, 6-CH<sub>2</sub>CH<sub>3</sub>), 2.34-2.20 (m, 2H, 8-CH<sub>2</sub>CH<sub>3</sub>), 2.04-1.90 (m, 2H, 8-CH<sub>2</sub>CH<sub>3</sub>), 1.04 (t, 3H, *J* = 7.4 Hz, 6-CH<sub>2</sub>CH<sub>3</sub>), 0.68 (t, 6H, *J* = 7.3 Hz, 8-CH<sub>2</sub>CH<sub>3</sub>). MS (ESI<sup>+</sup>) *m/z*: 445 (M<sup>+</sup>+Na). Anal. (C<sub>22</sub>H<sub>21</sub>F<sub>3</sub>O<sub>5</sub>) C, H, O.

**4'-Methylthio-6,8,8-triethyl-desmosdumotin B (15).** Yellow prisms, mp 190-191 °C (EtOAc-hexane). <sup>1</sup>H NMR (300 MHz, CDCl<sub>3</sub>): δ 13.11 (s, 1H, 5-OH), 7.70 (d, 2H, *J* = 8.7 Hz, Ar-*H*), 7.37 (d, 2H, *J* = 8.7 Hz, Ar-*H*), 6.85 (s, 1H, 3-*H*), 2.56 (s, 3H, 4'-SCH<sub>3</sub>), 2.45 (q, 2H, *J* = 7.3 Hz, 6-CH<sub>2</sub>CH<sub>3</sub>), 2.34-2.19 (m, 2H, 8-CH<sub>2</sub>CH<sub>3</sub>), 2.05-1.90 (m, 2H, 8-CH<sub>2</sub>CH<sub>3</sub>), 1.04 (t, 3H, *J* = 7.3 Hz, 6-CH<sub>2</sub>CH<sub>3</sub>), 0.67 (t, 6H, *J* = 7.3 Hz, 8-CH<sub>2</sub>CH<sub>3</sub>). MS (ESI<sup>+</sup>) *m/z*: 385 (M<sup>+</sup>+1). Anal. (C<sub>22</sub>H<sub>24</sub>O<sub>4</sub>S·1/8H<sub>2</sub>O) C, H, O.

**4'-Bromo-6,8,8-triethyl-desmosdumotin B (16).** Yellow prisms, mp 244-245 °C (EtOAc-hexane). <sup>1</sup>H NMR (300 MHz, CDCl<sub>3</sub>): δ 12.93 (s, 1H, 5-OH), 7.74-7.64 (m, 4H, Ar-*H*), 6.89 (s, 1H, 3-*H*), 2.45 (q, 2H, *J* = 7.3 Hz, 6-CH<sub>2</sub>CH<sub>3</sub>), 2.34-2.20 (m, 2H, 8-CH<sub>2</sub>CH<sub>3</sub>), 2.04-1.90 (m, 2H, 8-CH<sub>2</sub>CH<sub>3</sub>), 1.04 (t, 3H, *J* = 7.4 Hz, 6-CH<sub>2</sub>CH<sub>3</sub>), 0.67 (t, 6H, *J* = 7.3 Hz, 8-CH<sub>2</sub>CH<sub>3</sub>). MS (ESI<sup>+</sup>) *m/z*: 433 and 431 (1:1, M<sup>+</sup>+1). Anal. (C<sub>21</sub>H<sub>21</sub>BrO<sub>4</sub>) C, H, O.

**4'-Fluoro-6,8,8-triethyl-desmosdumotin B (17).** Pale yellow prisms, mp 196-197 °C (EtOAc-hexane). <sup>1</sup>H NMR (300 MHz, CDCl<sub>3</sub>): δ 12.99 (s, 1H, 5-OH), 7.84-7.76 (m, 2H, Ar-*H*), 7.31-7.22 (m, 2H, Ar-*H*), 6.85 (s, 1H, 3-*H*), 2.46 (q, 2H, *J* = 7.4 Hz, 6-CH<sub>2</sub>CH<sub>3</sub>), 2.34-2.20 (m, 2H, 8-CH<sub>2</sub>CH<sub>3</sub>), 2.05-

1.90 (m, 2H, 8-CH<sub>2</sub>CH<sub>3</sub>), 1.04 (t, 3H, *J* = 7.4 Hz, 6-CH<sub>2</sub>CH<sub>3</sub>), 0.68 (t, 6H, *J* = 7.3 Hz, 8-CH<sub>2</sub>CH<sub>3</sub>). MS (ESI<sup>+</sup>) *m/z*: 357 (M<sup>+</sup>+1). Anal. (C<sub>21</sub>H<sub>21</sub>FO<sub>4</sub>) C, H, O.

**4'-Bromomethyl-6,8,8-triethyldesmosdumotin B (18).** Yellow prisms, mp 154-155 °C (EtOAc-hexane). <sup>1</sup>H NMR (300 MHz, CDCl<sub>3</sub>): δ 12.99 (s, 1H, 5-OH), 7.79 (d, 2H, *J* = 8.5 Hz, 2' and 6'-H), 7.59 (d, 2H, *J* = 8.5 Hz, 3' and 5'-H), 6.91 (s, 1H, 3-H), 4.54 (s, 2H, 4'-CH<sub>2</sub>Br), 2.45 (q, 2H, *J* = 7.4 Hz, 6-CH<sub>2</sub>CH<sub>3</sub>), 2.34-2.20 (m, 2H, 8-CH<sub>2</sub>CH<sub>3</sub>), 2.06-1.92 (m, 2H, 8-CH<sub>2</sub>CH<sub>3</sub>), 1.04 (t, 3H, *J* = 7.4 Hz, 6-CH<sub>2</sub>CH<sub>3</sub>), 0.67 (t, 6H, *J* = 7.3 Hz, 8-CH<sub>2</sub>CH<sub>3</sub>). MS (ESI<sup>+</sup>) *m/z*: 433 and 431 (1:1, M<sup>+</sup>+1). Anal. (C<sub>22</sub>H<sub>23</sub>BrO<sub>4</sub>) C, H, O.

**4'-Methoxymethyl-6,8,8-triethyldesmosdumotin B (19).** Pale yellow prisms, mp 174-175 °C (EtOAc-hexane). <sup>1</sup>H NMR (300 MHz, CDCl<sub>3</sub>): δ 13.07 (s, 1H, 5-OH), 7.78 (d, 2H, *J* = 8.5 Hz, 2' and 6'-H), 7.53 (d, 2H, *J* = 8.5 Hz, 3' and 5'-H), 6.90 (s, 1H, 3-H), 3.45 (s, 2H, 4'-CH<sub>2</sub>OCH<sub>3</sub>), 2.45 (q, 2H, *J* = 7.3 Hz, 6-CH<sub>2</sub>CH<sub>3</sub>), 2.34-2.20 (m, 2H, 8-CH<sub>2</sub>CH<sub>3</sub>), 2.06-1.92 (m, 2H, 8-CH<sub>2</sub>CH<sub>3</sub>), 1.04 (t, 3H, *J* = 7.4 Hz, 6-CH<sub>2</sub>CH<sub>3</sub>), 0.67 (t, 6H, *J* = 7.3 Hz, 8-CH<sub>2</sub>CH<sub>3</sub>). MS (ESI<sup>+</sup>) *m/z*: 383 (M<sup>+</sup>+1). Anal. (C<sub>23</sub>H<sub>26</sub>O<sub>5</sub>) C, H, O.

**3'-Trifluoromethyl-6,8,8-triethyldesmosdumotin B (21).** Pale yellow prisms, mp 161-162 °C (EtOAc-hexane). <sup>1</sup>H NMR (300 MHz, CDCl<sub>3</sub>): δ 12.84 (s, 1H, 5-OH), 8.03-7.95 (m, 2H, Ar-H), 7.90-7.84 (m, 1H, Ar-H), 7.74 (t, 1H, *J* = 7.8 Hz, Ar-H), 6.96 (s, 1H, 3-H), 2.46 (q, 2H, *J* = 7.4 Hz, 6-CH<sub>2</sub>CH<sub>3</sub>), 2.34-2.21 (m, 2H, 8-CH<sub>2</sub>CH<sub>3</sub>), 2.04-1.91 (m, 2H, 8-CH<sub>2</sub>CH<sub>3</sub>), 1.05 (t, 3H, *J* = 7.4 Hz, 6-CH<sub>2</sub>CH<sub>3</sub>), 0.69 (t, 6H, *J* = 7.4 Hz, 8-CH<sub>2</sub>CH<sub>3</sub>). MS (ESI<sup>+</sup>) *m/z*: 407 (M<sup>+</sup>+1). Anal. (C<sub>22</sub>H<sub>21</sub>F<sub>3</sub>O<sub>4</sub>) C, H, O.

**3'-Methoxy-6,8,8-triethyldesmosdumotin B (22).** Pale yellow prisms, mp 129-130 °C (EtOAc-hexane). <sup>1</sup>H NMR (300 MHz, CDCl<sub>3</sub>): δ 13.03 (s, 1H, 5-OH), 7.48 (dd, 1H, *J* = 8.0, 8.5 Hz, 5'-H), 7.38 (br d, 1H, *J* = 8.0 Hz, 6'-H), 7.29 (t, 1H, *J* = 2.4 Hz, 2'-H), 7.13 (dd, 1H, *J* = 2.4, 8.5 Hz, 4'-H), 6.89 (s, 1H, 3-H), 3.90 (s, 3H, 4'-OCH<sub>3</sub>), 2.46 (q, 2H, *J* = 7.4 Hz, 6-CH<sub>2</sub>CH<sub>3</sub>), 2.33-2.19 (m, 2H, 8-CH<sub>2</sub>CH<sub>3</sub>), 2.08-1.92 (m, 2H, 8-CH<sub>2</sub>CH<sub>3</sub>), 1.04 (t, 3H, *J* = 7.4 Hz, 6-CH<sub>2</sub>CH<sub>3</sub>), 0.67 (t, 6H, *J* = 7.4 Hz, 8-CH<sub>2</sub>CH<sub>3</sub>). MS (ESI<sup>+</sup>) *m/z*: 369 (M<sup>+</sup>+1). Anal. (C<sub>22</sub>H<sub>24</sub>O<sub>5</sub>) C, H, O.

**3'-Trifluoromethoxy-6,8,8-triethyldesmosdumotin B (23).** Pale yellow prisms, mp 158-159 °C (EtOAc-hexane). <sup>1</sup>H NMR (300 MHz, CDCl<sub>3</sub>): δ 12.85 (s, 1H, 5-OH), 7.76-7.71 (m, 1H, Ar-H), 7.67-7.59 (m, 2H, Ar-H), 7.50-7.44 (m, 1H, Ar-H), 6.92 (s, 1H, 3-H), 2.45 (q, 2H, *J* = 7.4 Hz, 6-CH<sub>2</sub>CH<sub>3</sub>), 2.34-2.20 (m, 2H, 8-CH<sub>2</sub>CH<sub>3</sub>), 2.04-1.90 (m, 2H, 8-CH<sub>2</sub>CH<sub>3</sub>), 1.04 (t, 3H, *J* = 7.4 Hz, 6-CH<sub>2</sub>CH<sub>3</sub>), 0.68 (t, 6H, *J* = 7.4 Hz, 8-CH<sub>2</sub>CH<sub>3</sub>). MS (ESI<sup>+</sup>) *m/z*: 445 (M<sup>+</sup>+Na). Anal. (C<sub>22</sub>H<sub>21</sub>F<sub>3</sub>O<sub>5</sub>) C, H, O.

**3'-Fluoro-6,8,8-triethyldesmosdumotin B (24).** Pale yellow prisms, mp 191-192 °C (EtOAc-hexane). <sup>1</sup>H NMR (300 MHz, CDCl<sub>3</sub>): δ 12.90 (s, 1H, 5-OH), 7.62-7.51 (2H, m, Ar-H), 7.50-7.44 (1H, m, Ar-H), 7.36-7.26 (m, 1H, Ar-H), 6.90 (s, 1H, 3-H), 2.46 (q, 2H, *J* = 7.4 Hz, 6-CH<sub>2</sub>CH<sub>3</sub>), 2.37-2.20 (m, 2H, 8-CH<sub>2</sub>CH<sub>3</sub>), 2.06-1.91 (m, 2H, 8-CH<sub>2</sub>CH<sub>3</sub>), 1.04 (t, 3H, *J* = 7.4 Hz, 6-CH<sub>2</sub>CH<sub>3</sub>), 0.68 (t, 6H, *J* = 7.4 Hz, 8-CH<sub>2</sub>CH<sub>3</sub>). MS (ESI<sup>+</sup>) *m/z*: 379 (M<sup>+</sup>+Na). Anal. (C<sub>21</sub>H<sub>21</sub>FO<sub>4</sub>) C, H, O.

**2'-Trifluoromethyl-6,8,8-triethyldesmosdumotin B (26).** Pale yellow prisms, mp 152-154 °C (EtOAc-hexane). <sup>1</sup>H NMR (300 MHz, CDCl<sub>3</sub>): δ 12.89 (s, 1H, 5-OH), 7.90-7.84 (m, 1H, Ar-H), 7.78-7.72 (m, 2H, Ar-H), 7.58-7.54 (m, 1H, Ar-H), 6.62 (s, 1H, 3-H), 2.46 (q, 2H, *J* = 7.3 Hz, 6-CH<sub>2</sub>CH<sub>3</sub>), 2.21-2.08 (m, 2H, 8-CH<sub>2</sub>CH<sub>3</sub>), 1.98-1.82 (m, 2H, 8-CH<sub>2</sub>CH<sub>3</sub>), 1.04 (t, 3H, *J* = 7.4 Hz, 6-CH<sub>2</sub>CH<sub>3</sub>), 0.64 (t, 6H, *J* = 7.3 Hz, 8-CH<sub>2</sub>CH<sub>3</sub>). MS (ESI<sup>+</sup>) *m/z*: 407 (M<sup>+</sup>+1). Anal. (C<sub>22</sub>H<sub>21</sub>F<sub>3</sub>O<sub>4</sub>) C, H, O.

**2'-Fluoro-6,8,8-triethyldesmosdumotin B (28).** Yellow prisms, mp 140-141 °C (EtOAc-hexane). <sup>1</sup>H NMR (300 MHz, CDCl<sub>3</sub>): δ 12.96 (s, 1H, 5-OH), 7.74 (dt, 1H, *J* = 8.0, 1.6 Hz, Ar-H), 7.64-7.55 (m, 1H, Ar-H), 7.36 (ddd, 1H, *J* = 8.6, 7.4, 1.1 Hz, Ar-H), 7.28 (ddd, 1H, *J* = 9.3, 8.6, 1.1 Hz, Ar-H), 7.04 (s, 1H, 3-H), 2.46 (q, 2H, *J* = 7.4 Hz, 6-CH<sub>2</sub>CH<sub>3</sub>), 2.31-2.18 (m, 2H, 8-CH<sub>2</sub>CH<sub>3</sub>), 2.05-1.90 (m, 2H, 8-CH<sub>2</sub>CH<sub>3</sub>), 1.04 (t, 3H, *J* = 7.4 Hz, 6-CH<sub>2</sub>CH<sub>3</sub>), 0.67 (t, 6H, *J* = 7.4 Hz, 8-CH<sub>2</sub>CH<sub>3</sub>). MS (ESI<sup>+</sup>) *m/z*: 379 (M<sup>+</sup>+Na). Anal. (C<sub>21</sub>H<sub>21</sub>FO<sub>4</sub>) C, H, O.

**3',4'-Dimethyl-6,8,8-triethyldesmosdumotin B (30).** Orange prisms, mp 160-161 °C (EtOAc-hexane). <sup>1</sup>H NMR (300 MHz, CDCl<sub>3</sub>): δ 13.16 (s, 1H, 5-OH), 7.56-7.50 (m, 2H, Ar-H), 7.34-7.29 (m, 1H, Ar-H), 6.86 (s, 1H, 3-H), 2.46 (q, 2H, *J* = 7.4 Hz, 6-CH<sub>2</sub>CH<sub>3</sub>), 2.37 (s, 6H, 3'- and 4'-CH<sub>3</sub>), 2.35-2.18 (m, 2H, 8-CH<sub>2</sub>CH<sub>3</sub>), 2.06-1.82 (m, 2H, 8-CH<sub>2</sub>CH<sub>3</sub>), 1.04 (t, 3H, *J* = 7.4 Hz, 6-CH<sub>2</sub>CH<sub>3</sub>), 0.67 (t, 6H, *J* = 7.3 Hz, 8-CH<sub>2</sub>CH<sub>3</sub>). MS (ESI<sup>+</sup>) *m/z*: 367 (M<sup>+</sup>+1). Anal. (C<sub>23</sub>H<sub>26</sub>O<sub>4</sub>) C, H, O.

**3'-Chloro-4'-methyl-6,8,8-triethyldesmosdumotin B (31).** Pale yellow prisms, mp 167-168 °C (EtOAc-hexane). <sup>1</sup>H NMR (300 MHz, CDCl<sub>3</sub>): δ 12.98 (s, 1H, 5-OH), 7.76-7.72 (m, 1H, 2'-H), 7.58 (d, 1H, *J* = 8.0 Hz, 5'- or 6'-H), 7.42 (d, 1H, *J* = 8.0 Hz, 5'- or 6'-H), 6.86 (s, 1H, 3-H), 2.48 (s, 3H, 4'-CH<sub>3</sub>), 2.51-2.39 (m, 2H, 6-CH<sub>2</sub>CH<sub>3</sub>), 2.34-2.19 (m, 2H, 8-CH<sub>2</sub>CH<sub>3</sub>), 2.06-1.90 (m, 2H, 8-CH<sub>2</sub>CH<sub>3</sub>), 1.04 (t, 3H, *J* = 7.0 Hz, 6-CH<sub>2</sub>CH<sub>3</sub>), 0.67 (t, 6H, *J* = 7.0 Hz, 8-CH<sub>2</sub>CH<sub>3</sub>). MS (ESI<sup>+</sup>) *m/z*: 409 (M<sup>+</sup>+Na). Anal. (C<sub>22</sub>H<sub>23</sub>ClO<sub>4</sub>) C, H, O.

**3'-Fluoro-4'-methyl-6,8,8-triethyldesmosdumotin B (32).** Pale yellow prisms, mp 189-190 °C (EtOAc-hexane). <sup>1</sup>H NMR (300 MHz, CDCl<sub>3</sub>): δ 12.98 (s, 1H, 5-OH), 7.52-7.34 (m, 3H, Ar-H), 6.85 (s, 1H, 3-H), 2.45 (q, 2H, *J* = 7.4 Hz, 6-CH<sub>2</sub>CH<sub>3</sub>), 2.38 (d, 3H, *J* = 1.9 Hz, 4'-CH<sub>3</sub>), 2.34-2.20 (m, 2H, 8-CH<sub>2</sub>CH<sub>3</sub>), 2.03-1.90 (m, 2H, 8-CH<sub>2</sub>CH<sub>3</sub>), 1.04 (t, 3H, *J* = 7.4 Hz, 6-CH<sub>2</sub>CH<sub>3</sub>), 0.67 (t, 6H, *J* = 7.4 Hz, 8-CH<sub>2</sub>CH<sub>3</sub>). MS (ESI<sup>+</sup>) *m/z*: 371 (M<sup>+</sup>+1). Anal. (C<sub>22</sub>H<sub>23</sub>FO<sub>4</sub>·1/16H<sub>2</sub>O) C, H, O.

**6,8,8-Triethyl-2',4',5'-trimethyldesmosdumotin B (33).** Pale yellow prisms, mp 129-130 °C (EtOAc-hexane). <sup>1</sup>H NMR (300 MHz, CDCl<sub>3</sub>): δ 13.18 (s, 1H, 5-OH), 7.21 (s, 1H, Ar-H), 7.13 (s, 1H, Ar-H), 6.59 (s, 1H, 3-H), 2.46 (q, 2H, *J* = 7.3 Hz, 6-CH<sub>2</sub>CH<sub>3</sub>), 2.39, 2.32, and 2.30 (s, 3H each, 2', 4', and 5'-CH<sub>3</sub>), 2.26-2.12 (m, 2H, 8-CH<sub>2</sub>CH<sub>3</sub>), 1.97-1.82 (m, 2H, 8-CH<sub>2</sub>CH<sub>3</sub>), 1.04 (t, 3H, *J* = 7.4 Hz, 6-CH<sub>2</sub>CH<sub>3</sub>), 0.65 (t, 6H, *J* = 7.3 Hz, 8-CH<sub>2</sub>CH<sub>3</sub>). MS *m/z* 381 (M<sup>+</sup>+1). Anal. (C<sub>24</sub>H<sub>28</sub>O<sub>4</sub>) C, H, O

**4'-Methoxy-2'-methyl-6,8,8-triethyldesmosdumotin B (34).** Pale yellow prisms, mp 142-143 °C (EtOAc-hexane). <sup>1</sup>H NMR (300 MHz, CDCl<sub>3</sub>): δ 13.19 (s, 1H, 5-OH), 7.44-7.38 (dd, 1H, 6'-H), 6.90-6.84 (m, 2H, 3', and 5'-H), 6.57 (s, 1H, 3-H), 3.88 (s, 3H, 4'-OCH<sub>3</sub>), 2.46 (q, 2H, *J* = 7.4 Hz, 6-CH<sub>2</sub>CH<sub>3</sub>), 2.46 (s, 3H, 2'-CH<sub>3</sub>), 2.25-2.12 (m, 2H, 8-CH<sub>2</sub>CH<sub>3</sub>), 1.97-1.83 (m, 2H, 8-CH<sub>2</sub>CH<sub>3</sub>), 1.04 (t, 3H, *J* = 7.4 Hz, 6-CH<sub>2</sub>CH<sub>3</sub>), 0.65 (t, 6H, *J* = 7.3 Hz, 8-CH<sub>2</sub>CH<sub>3</sub>). MS *m/z* 383 (M<sup>+</sup>+1). Anal. (C<sub>23</sub>H<sub>26</sub>O<sub>5</sub>) C, H, O.

**3',4'-Dimethoxy-6,8,8-triethyldesmosdumotin B (36).** Yellow prisms, mp 148-149 °C (EtOAc-hexane). <sup>1</sup>H NMR (300 MHz, CDCl<sub>3</sub>): δ 13.17 (s, 1H, 5-OH), 7.65 (dd, 1H, *J* = 8.2, 2.3 Hz, 6'-H), 7.23 (d, 1H, *J* = 2.3 Hz, 2'-H), 7.01 (d, 1H, *J* = 8.2 Hz, 5'-H), 6.81 (s, 1H, 3-H), 3.9 and 3.97 (s, 3H each, 3' and 4'-OCH<sub>3</sub>), 2.45 (q, 2H, *J* = 7.3 Hz, 6-CH<sub>2</sub>CH<sub>3</sub>), 2.33-2.21 (m, 2H, 6- or 8-CH<sub>2</sub>CH<sub>3</sub>), 2.04-1.91 (m, 2H, 6- or 8-CH<sub>2</sub>CH<sub>3</sub>), 1.04 (t, 3H, *J* = 7.3 Hz, 6-CH<sub>2</sub>CH<sub>3</sub>), 0.68 (t, 3H, *J* = 7.3 Hz, 8-CH<sub>2</sub>CH<sub>3</sub>). MS (ESI<sup>+</sup>) *m/z*: 399 (M<sup>+</sup>+1). Anal. (C<sub>23</sub>H<sub>26</sub>O<sub>6</sub>) C, H, O.

**3'-Fluoro-4'-methoxy-6,8,8-triethyldesmosdumotin B (37).** Yellow prisms, mp 175-176 °C (EtOAc-hexane). <sup>1</sup>H NMR (300 MHz, CDCl<sub>3</sub>): δ 13.04 (s, 1H, 5-OH), 7.60-7.54 (m, 1H, 6'-H), 7.54-7.46 (m, 1H, 2'-H), 7.11 (dd, 1H, *J* = 8.2, 8.5 Hz, 5'-H), 6.79 (s, 1H, 3-H), 4.00 (s, 3H, 4'-OCH<sub>3</sub>), 2.45 (q, 2H, *J* = 7.5 Hz, 4'-CH<sub>2</sub>CH<sub>3</sub>), 2.33-2.18 (m, 2H, 6- or 8-CH<sub>2</sub>CH<sub>3</sub>), 2.04-1.90 (m, 2H, 6- or 8-CH<sub>2</sub>CH<sub>3</sub>), 1.04 (t, 3H, *J* = 7.5 Hz, 6-CH<sub>2</sub>CH<sub>3</sub>), 0.67 (t, 6H, *J* = 7.5 Hz, 4'-CH<sub>2</sub>CH<sub>3</sub>). MS (ESI<sup>+</sup>) *m/z*: 387 (M<sup>+</sup>+1). Anal. (C<sub>22</sub>H<sub>23</sub>FO<sub>5</sub>) C, H, O.

**3'-Chloro-4'-methoxy-6,8,8-triethyldesmosdumotin B (38).** Pale yellow prisms, mp 175-176 °C (EtOAc-hexane). <sup>1</sup>H NMR (300 MHz, CDCl<sub>3</sub>): δ 13.04 (s, 1H, 5-OH), 7.78 (d, 1H, *J* = 2.1 Hz, 2'-H), 7.69 (dd, 1H, *J* = 8.8, 2.1 Hz, 6'-H), 7.08 (dd, 1H, *J* = 8.8 Hz, 5'-H), 6.79 (s, 1H, 3-H), 4.01 (s, 3H, 4'-OCH<sub>3</sub>), 2.45 (q, 2H, *J* = 7.3 Hz, 6-CH<sub>2</sub>CH<sub>3</sub>), 2.34-2.19 (m, 2H, 8-CH<sub>2</sub>CH<sub>3</sub>), 2.04-1.90 (m, 2H, 8-CH<sub>2</sub>CH<sub>3</sub>), 1.04 (t, 3H, *J* = 7.3 Hz, 6-CH<sub>2</sub>CH<sub>3</sub>), 0.67 (t, 6H, *J* = 7.3 Hz, 8-CH<sub>2</sub>CH<sub>3</sub>). MS (ESI<sup>+</sup>) *m/z*: 403 (M<sup>+</sup>+1). Anal. (C<sub>22</sub>H<sub>23</sub>ClO<sub>5</sub>) C, H, O.

**4'-Methoxy-2',3'-dimethyl-6,8,8-triethyldesmosdumotin B (39).** Pale yellow prisms, mp 127-128 °C (EtOAc-hexane). <sup>1</sup>H NMR (300 MHz, CDCl<sub>3</sub>): δ 13.21 (s, 1H, 5-OH), 7.26 (d, 1H, *J* = 8.5 Hz, 6'-H), 6.84 (d, 1H, *J* = 8.5 Hz, 5'-H), 6.54 (s, 1H, 3-H), 2.46 (q, 2H, *J* = 7.4 Hz, 6-CH<sub>2</sub>CH<sub>3</sub>), 2.31 (s, 3H, 2' or 3'-CH<sub>3</sub>), 2.23 (s, 3H, 2' or 3'-CH<sub>3</sub>), 2.24-2.10 (m, 2H, 8-CH<sub>2</sub>CH<sub>3</sub>), 1.96-1.82 (m, 2H, 8-CH<sub>2</sub>CH<sub>3</sub>),

1.04 (t, 3H,  $J = 7.4$  Hz, 6- $\text{CH}_2\text{CH}_3$ ), 0.65 (t, 6H,  $J = 7.4$  Hz, 8- $\text{CH}_2\text{CH}_3$ ). MS  $m/z$  397 ( $\text{M}^+ + 1$ ). Anal. ( $\text{C}_{24}\text{H}_{28}\text{O}_5$ ) C, H, O.

**4'-Methoxy-2',5'-dimethyl-6,8,8-triethyl-desmosdumotin B (40).** Pale yellow prisms, mp 159-160 °C (EtOAc-hexane).  $^1\text{H}$  NMR (300 MHz,  $\text{CDCl}_3$ ):  $\delta$  13.25 (s, 1H, 5-OH), 7.22 (s, 1H, 6'-H), 6.75 (s, 1H, 3'-H), 6.56 (s, 1H, 3-H), 2.46 (q, 2H,  $J = 7.4$  Hz, 6- $\text{CH}_2\text{CH}_3$ ), 2.45 (s, 3H, 2'- $\text{CH}_3$ ), 2.27-2.12 (m, 2H, 8- $\text{CH}_2\text{CH}_3$ ), 2.23 (s, 3H, 2'- $\text{CH}_3$ ), 1.98-1.83 (m, 2H, 8- $\text{CH}_2\text{CH}_3$ ), 1.04 (t, 3H,  $J = 7.4$  Hz, 6- $\text{CH}_2\text{CH}_3$ ), 0.65 (t, 6H,  $J = 7.4$  Hz, 8- $\text{CH}_2\text{CH}_3$ ). MS  $m/z$  397 ( $\text{M}^+ + 1$ ). Anal. ( $\text{C}_{24}\text{H}_{28}\text{O}_5$ ) C, H, O.

**6,8,8-Triethyl-2',3',4'-trimethoxy-desmosdumotin B (41).** Pale yellow prisms, mp 115-116 °C (EtOAc-hexane).  $^1\text{H}$  NMR (300 MHz,  $\text{CDCl}_3$ ):  $\delta$  13.28 (s, 1H, 5-OH), 7.42 (d, 1H,  $J = 9.0$  Hz, 5' or 6'-H), 7.15 (s, 1H, 3-H), 6.82 (d, 1H,  $J = 9.0$  Hz, 5' or 6'-H), 3.98, 3.95, and 3.91 (s, 3H each, 3', 4', and 5'- $\text{OCH}_3$ ), 2.45 (q, 2H,  $J = 7.3$  Hz, 6- $\text{CH}_2\text{CH}_3$ ), 2.30-2.16 (m, 2H, 8- $\text{CH}_2\text{CH}_3$ ), 2.04-1.90 (m, 2H, 8- $\text{CH}_2\text{CH}_3$ ), 1.04 (t, 3H,  $J = 7.3$  Hz, 6- $\text{CH}_2\text{CH}_3$ ), 0.67 (t, 6H,  $J = 7.3$  Hz, 8- $\text{CH}_2\text{CH}_3$ ). MS ( $\text{ESI}^+$ )  $m/z$ : 429 ( $\text{M}^+ + 1$ ). Anal. ( $\text{C}_{24}\text{H}_{28}\text{O}_7$ ) C, H, O.

**6,8,8-Triethyl-3',4',5'-trimethoxy-desmosdumotin B (42).** Pale yellow prisms, mp 156-157 °C (EtOAc-hexane).  $^1\text{H}$  NMR (300 MHz,  $\text{CDCl}_3$ ):  $\delta$  13.05 (s, 1H, 5-OH), 7.00 (s, 2H, 2' and 6'-H), 6.84 (s, 1H, 3-H), 3.95 (s, 6H, 3' and 5'- $\text{OCH}_3$ ), 3.94 (s, 3H, 4'- $\text{OCH}_3$ ), 2.46 (q, 2H,  $J = 7.3$  Hz, 6- $\text{CH}_2\text{CH}_3$ ), 2.34-2.20 (m, 2H, 8- $\text{CH}_2\text{CH}_3$ ), 2.02-1.88 (m, 2H, 8- $\text{CH}_2\text{CH}_3$ ), 1.04 (t, 3H,  $J = 7.3$  Hz, 6- $\text{CH}_2\text{CH}_3$ ), 0.69 (t, 6H,  $J = 7.3$  Hz, 8- $\text{CH}_2\text{CH}_3$ ). MS ( $\text{ESI}^+$ )  $m/z$ : 429 ( $\text{M}^+ + 1$ ). Anal. ( $\text{C}_{24}\text{H}_{28}\text{O}_7$ ) C, H, O.

**3'-Chloro-4',5'-dimethoxy-6,8,8-triethyl-desmosdumotin B (43).** Pale yellow prisms, mp 147-148 °C (EtOAc-hexane).  $^1\text{H}$  NMR (300 MHz,  $\text{CDCl}_3$ ):  $\delta$  12.94 (s, 1H, 5-OH), 7.43 (d, 1H,  $J = 2.3$  Hz, 2'-H), 7.17 (d, 1H,  $J = 2.5$  Hz, 6'-H), 6.83 (s, 1H, 3-H), 3.97 (s, 6H, 4' and 5'- $\text{OCH}_3$ ), 2.45 (q, 2H,  $J = 7.3$  Hz, 6- $\text{CH}_2\text{CH}_3$ ), 2.38-2.20 (m, 2H, 8- $\text{CH}_2\text{CH}_3$ ), 2.04-1.89 (m, 2H, 8- $\text{CH}_2\text{CH}_3$ ), 1.04 (t, 3H,  $J = 7.3$  Hz, 6- $\text{CH}_2\text{CH}_3$ ), 0.68 (t, 3H,  $J = 7.3$  Hz, 8- $\text{CH}_2\text{CH}_3$ ). MS ( $\text{ESI}^+$ )  $m/z$ : 433 and 435 (3:1,  $\text{M}^+ + 1$ ). Anal. ( $\text{C}_{23}\text{H}_{25}\text{ClO}_6$ ) C, H, O.

**3',4'-Dihydroxy-6,8,8-triethyl-desmosdumotin B (44).** Pale yellow prisms, mp 200-201 °C (EtOAc-hexane).  $^1\text{H}$  NMR (300 MHz, 10% $\text{CD}_3\text{OD}$  in  $\text{CDCl}_3$ ):  $\delta$  7.31-7.25 (m, 2H, Ar-H), 7.00-6.95 (m, 1H, Ar-H), 6.76 (s, 1H, 3-H), 2.45 (q, 2H,  $J = 7.3$  Hz, 6- $\text{CH}_2\text{CH}_3$ ), 2.30-2.16 (m, 2H, 8- $\text{CH}_2\text{CH}_3$ ), 2.07-1.90 (m, 2H, 8- $\text{CH}_2\text{CH}_3$ ), 1.04 (t, 3H,  $J = 7.3$  Hz, 6- $\text{CH}_2\text{CH}_3$ ), 0.66 (t, 6H,  $J = 7.3$  Hz, 8- $\text{CH}_2\text{CH}_3$ ). MS ( $\text{ESI}^+$ )  $m/z$ : 393 ( $\text{M}^+ + \text{Na}$ ). Anal. ( $\text{C}_{21}\text{H}_{22}\text{O}_6$ ) C, H, O.

**2',3'-Dimethyl-4'-hydroxy-6,8,8-triethyl-desmosdumotin B (45).** Pale yellow prisms, mp 254-256 °C (EtOAc-hexane).  $^1\text{H}$  NMR (300 MHz, 10% $\text{CD}_3\text{OD}$  in  $\text{CDCl}_3$ ):  $\delta$  7.12 (d, 1H,  $J = 8.5$  Hz, 6'-H), 6.78 (d, 1H,  $J = 8.5$  Hz, 5'-H), 6.53 (s, 1H, 3-H), 2.45 (q, 2H,  $J = 7.4$  Hz, 6- $\text{CH}_2\text{CH}_3$ ), 2.30 (s, 3H, 2' or 3'- $\text{CH}_3$ ), 2.23 (s, 3H, 2' or 3'- $\text{CH}_3$ ), 2.24-2.10 (m, 2H, 8- $\text{CH}_2\text{CH}_3$ ), 1.99-1.84 (m, 2H, 8- $\text{CH}_2\text{CH}_3$ ), 1.04

(t, 3H,  $J = 7.4$  Hz, 6- $\text{CH}_2\text{CH}_3$ ), 0.65 (t, 6H,  $J = 7.4$  Hz, 8- $\text{CH}_2\text{CH}_3$ ). MS (ESI<sup>+</sup>)  $m/z$ : 383 ( $\text{M}^+ + 1$ ). Anal. ( $\text{C}_{23}\text{H}_{26}\text{O}_5 \cdot 1/8\text{H}_2\text{O}$ ) C, H, O.

**3',5'-Dimethyl-4'-hydroxy-6,8,8-triethyl-desmosdumotin B (46).** Pale yellow prisms, mp 204–205 °C (EtOAc-hexane). <sup>1</sup>H NMR (300 MHz,  $\text{CDCl}_3$ ):  $\delta$  13.27 (s, 1H, 5-OH), 7.42 (s, 2H, 2' and 6'-H), 6.7 (s, 1H, 3-H), 5.31 (s, 1H, 4'-OH), 2.46 (q, 2H,  $J = 7.3$  Hz, 6- $\text{CH}_2\text{CH}_3$ ), 2.35 (s, 3H, 3' and 5'- $\text{CH}_3$ ), 2.31–2.20 (m, 2H, 8- $\text{CH}_2\text{CH}_3$ ), 2.06–1.94 (m, 2H, 8- $\text{CH}_2\text{CH}_3$ ), 1.04 (t, 3H,  $J = 7.3$  Hz, 6- $\text{CH}_2\text{CH}_3$ ), 0.67 (t, 6H,  $J = 7.3$  Hz, 8- $\text{CH}_2\text{CH}_3$ ). MS (ESI<sup>+</sup>)  $m/z$ : 383 ( $\text{M}^+ + 1$ ). Anal. ( $\text{C}_{23}\text{H}_{26}\text{O}_5$ ) C, H, O.

**2',3'-Dimethyl-6,8,8-triethyl-desmosdumotin B (47).** Pale yellow prisms, mp 133–134 °C (EtOAc-hexane). <sup>1</sup>H NMR (300 MHz,  $\text{CDCl}_3$ ):  $\delta$  13.10 (s, 1H, 5-OH), 7.41–7.34 (m, 1H, Ar-H), 7.30–7.24 (m, 2H, Ar-H), 6.57 (s, 1H, 3-H), 2.46 (q, 2H,  $J = 7.4$  Hz, 6- $\text{CH}_2\text{CH}_3$ ), 2.38 (s, 3H, 2' or 3'- $\text{CH}_3$ ), 2.29 (s, 3H, 2' or 3'- $\text{CH}_3$ ), 2.26–2.10 (m, 2H, 8- $\text{CH}_2\text{CH}_3$ ), 1.94–1.82 (m, 2H, 8- $\text{CH}_2\text{CH}_3$ ), 1.04 (t, 3H,  $J = 7.4$  Hz, 6- $\text{CH}_2\text{CH}_3$ ), 0.66 (t, 6H,  $J = 7.4$  Hz, 8- $\text{CH}_2\text{CH}_3$ ). MS (ESI<sup>+</sup>)  $m/z$ : 367 ( $\text{M}^+ + 1$ ). Anal. ( $\text{C}_{23}\text{H}_{26}\text{O}_4$ ) C, H, O.

**2',5'-Dimethyl-6,8,8-triethyl-desmosdumotin B (48).** Pale yellow prisms, mp 110–111 °C (EtOAc-hexane). <sup>1</sup>H NMR (300 MHz,  $\text{CDCl}_3$ ):  $\delta$  13.12 (s, 1H, 5-OH), 7.32–7.21 (m, 3H, Ar-H), 6.60 (s, 1H, 3-H), 3.95 and 3.89 (s, 3H each, 2' and 3'- $\text{OCH}_3$ ), 2.46 (q, 2H,  $J = 7.3$  Hz, 6- $\text{CH}_2\text{CH}_3$ ), 2.40 (s, 6H, 2' and 5'- $\text{CH}_3$ ), 2.62–2.12 (m, 2H, 8- $\text{CH}_2\text{CH}_3$ ), 1.98–1.84 (m, 2H, 8- $\text{CH}_2\text{CH}_3$ ), 1.04 (t, 3H,  $J = 7.4$  Hz, 6- $\text{CH}_2\text{CH}_3$ ), 0.66 (t, 6H,  $J = 7.3$  Hz, 8- $\text{CH}_2\text{CH}_3$ ). MS (ESI<sup>+</sup>)  $m/z$ : 399 ( $\text{M}^+ + \text{Na}$ ). Anal. ( $\text{C}_{23}\text{H}_{26}\text{O}_4$ ) C, H, O.

**2',3'-Dimethoxy-6,8,8-triethyl-desmosdumotin B (50).** Pale yellow prisms, mp 145–146 °C (EtOAc-hexane). <sup>1</sup>H NMR (300 MHz,  $\text{CDCl}_3$ ):  $\delta$  13.16 (s, 1H, 5-OH), 7.25–7.10 (m, 3H, Ar-H), 7.15 (s, 1H, 3-H), 3.95 and 3.89 (s, 3H each, 2' and 3'- $\text{OCH}_3$ ), 2.46 (q, 2H,  $J = 7.3$  Hz, 6- $\text{CH}_2\text{CH}_3$ ), 2.29–2.14 (m, 2H, 8- $\text{CH}_2\text{CH}_3$ ), 2.04–1.91 (m, 2H, 8- $\text{CH}_2\text{CH}_3$ ), 1.04 (t, 3H,  $J = 7.4$  Hz, 6- $\text{CH}_2\text{CH}_3$ ), 0.67 (t, 6H,  $J = 7.3$  Hz, 8- $\text{CH}_2\text{CH}_3$ ). MS (ESI<sup>+</sup>)  $m/z$ : 399 ( $\text{M}^+ + 1$ ). Anal. ( $\text{C}_{23}\text{H}_{26}\text{O}_6$ ) C, H, O.

**2',5'-Dimethoxy-6,8,8-triethyl-desmosdumotin B (51).** Pale yellow prisms, mp 95–96 °C (EtOAc-hexane). <sup>1</sup>H NMR (300 MHz,  $\text{CDCl}_3$ ):  $\delta$  13.21 (s, 1H, 5-OH), 7.26 (s, 1H, 3-H), 7.23 (d, 1H,  $J = 3.0$  Hz, 6'-H), 7.09 (dd, 1H,  $J = 9.2$  and 3.0 Hz, 4'-H), 7.01 (d, 1H,  $J = 9.2$  Hz, 3'-H), 3.92 and 3.84 (s, 3H each, 2' and 5'- $\text{OCH}_3$ ), 2.45 (q, 2H,  $J = 7.3$  Hz, 6- $\text{CH}_2\text{CH}_3$ ), 2.30–2.16 (m, 2H, 8- $\text{CH}_2\text{CH}_3$ ), 2.04–1.90 (m, 2H, 8- $\text{CH}_2\text{CH}_3$ ), 1.04 (t, 3H,  $J = 7.4$  Hz, 6- $\text{CH}_2\text{CH}_3$ ), 0.67 (t, 6H,  $J = 7.3$  Hz, 8- $\text{CH}_2\text{CH}_3$ ). MS (ESI<sup>+</sup>)  $m/z$ : 399 ( $\text{M}^+ + 1$ ). Anal. ( $\text{C}_{23}\text{H}_{26}\text{O}_6$ ) C, H, O.

**3',5'-Dimethoxy-6,8,8-triethyl-desmosdumotin B (52).** Pale yellow prisms, mp 133–134 °C (EtOAc-hexane). <sup>1</sup>H NMR (300 MHz,  $\text{CDCl}_3$ ):  $\delta$  13.2 (s, 1H, 5-OH), 6.90 (d, 2H,  $J = 2.4$  Hz, 2' and 6'-H), 6.87 (s, 1H, 3-H), 6.66 (t, 1H,  $J = 2.4$  Hz, 4'-H), 3.88 (s, 6H, 2' and 5'- $\text{OCH}_3$ ), 3.92 and 3.84 (s, 3H each, 2' and 5'- $\text{OCH}_3$ ), 2.45 (q, 2H,  $J = 7.3$  Hz, 6- $\text{CH}_2\text{CH}_3$ ), 2.32–2.17 (m, 2H, 8- $\text{CH}_2\text{CH}_3$ ), 2.05–1.91



(m, 2H, 8- $CH_2CH_3$ ), 1.04 (t, 3H,  $J = 7.4$  Hz, 6- $CH_2CH_3$ ), 0.67 (t, 6H,  $J = 7.3$  Hz, 8- $CH_2CH_3$ ). MS (ESI<sup>+</sup>)  $m/z$ : 399 ( $M^+ + 1$ ). Anal. ( $C_{23}H_{26}O_6$ ) C, H, O.

**2',3'-Diethoxy-6,8,8-triethyl-desmosdumotin B (53).** Pale orange prisms, mp 115-116 °C (EtOAc-hexane). <sup>1</sup>H NMR (300 MHz,  $CDCl_3$ ):  $\delta$  13.21 (s, 1H, 5-OH), 7.24-7.07 (m, 4H, Ar-H and 3-H), 4.14 and 4.12 (q, 2H each,  $J = 6.9$  Hz, 2' and 3'- $OCH_2CH_3$ ), 2.46 (q, 2H,  $J = 7.3$  Hz, 6- $CH_2CH_3$ ), 2.29-2.14 (m, 2H, 8- $CH_2CH_3$ ), 2.04-1.90 (m, 2H, 8- $CH_2CH_3$ ), 1.51 and 1.35 (t, 3H each,  $J = 6.9$  Hz, 2' and 3'- $OCH_2CH_3$ ), 1.04 (t, 3H,  $J = 7.3$  Hz, 6- $CH_2CH_3$ ), 0.66 (t, 6H,  $J = 7.3$  Hz, 8- $CH_2CH_3$ ). MS  $m/z$  459 ( $M^+ + Na$ ). Anal. ( $C_{25}H_{30}O_6$ ) C, H, O.

**2'-Fluoro-5'-methyl-6,8,8-triethyl-desmosdumotin B (54).** Pale yellow prisms, mp 118-119 °C (EtOAc-hexane). <sup>1</sup>H NMR (300 MHz,  $CDCl_3$ ):  $\delta$  13.00 (s, 1H, 5-OH), 7.50-7.42 (m, 1H, Ar-H), 7.40-7.33 (m, 1H, Ar-H), 7.15 (dd, 1H,  $J = 11.0$  and 8.5 Hz, Ar-H), 7.00 (s, 1H, 3-H), 2.46 (q, 2H,  $J = 7.4$  Hz, 6- $CH_2CH_3$ ), 2.44 (s, 3H, 5'- $CH_3$ ), 2.31-2.18 (m, 2H, 8- $CH_2CH_3$ ), 2.04-1.90 (m, 2H, 8- $CH_2CH_3$ ), 1.04 (t, 3H,  $J = 7.4$  Hz, 6- $CH_2CH_3$ ), 0.67 (t, 6H,  $J = 7.3$  Hz, 8- $CH_2CH_3$ ). MS  $m/z$  403 ( $M^+ + Na$ ). Anal. ( $C_{22}H_{23}FO_4$ ) C, H, O.

**4'-Fluoro-3'-methyl-6,8,8-triethyl-desmosdumotin B (55).** Pale yellow prisms, mp 178-179 °C (EtOAc-hexane). <sup>1</sup>H NMR (300 MHz,  $CDCl_3$ ):  $\delta$  13.04 (s, 1H, 5-OH), 7.65-7.58 (m, 2H, Ar-H), 7.23-7.15 (m, 1H, Ar-H), 6.83 (s, 1H, 3-H), 2.45 (q, 2H,  $J = 7.3$  Hz, 6- $CH_2CH_3$ ), 2.39 (d, 3H,  $J = 1.8$  Hz, 3'- $CH_3$ ), 2.34-2.20 (m, 2H, 8- $CH_2CH_3$ ), 2.05-1.90 (m, 2H, 8- $CH_2CH_3$ ), 1.04 (t, 3H,  $J = 7.4$  Hz, 6- $CH_2CH_3$ ), 0.67 (t, 6H,  $J = 7.3$  Hz, 8- $CH_2CH_3$ ). MS  $m/z$  403 ( $M^+ + Na$ ). Anal. ( $C_{22}H_{23}FO_4$ ) C, H, O.

**Table S1. Elemental Analyses of Synthesized Compounds 5-55**

| Comp. | Formula                                                               | C%     |       | H%     |       | O%     |       |
|-------|-----------------------------------------------------------------------|--------|-------|--------|-------|--------|-------|
|       |                                                                       | Calcd. | Found | Calcd. | Found | Calcd. | Found |
| 5     | C <sub>24</sub> H <sub>28</sub> O <sub>4</sub> ·1/8H <sub>2</sub> O   | 75.32  | 75.06 | 7.44   | 7.41  | 17.24  | 16.93 |
| 6     | C <sub>24</sub> H <sub>28</sub> O <sub>4</sub>                        | 75.76  | 75.65 | 7.42   | 7.41  | 16.82  | 16.98 |
| 7     | C <sub>25</sub> H <sub>30</sub> O <sub>4</sub>                        | 76.00  | 76.11 | 7.66   | 7.61  | 16.22  | 16.34 |
| 8     | C <sub>25</sub> H <sub>30</sub> O <sub>4</sub> ·1/8H <sub>2</sub> O   | 75.68  | 75.57 | 7.68   | 7.71  | -      | -     |
| 9     | C <sub>22</sub> H <sub>21</sub> F <sub>3</sub> O <sub>4</sub>         | 65.02  | 64.94 | 5.21   | 5.06  | 15.75  | 15.85 |
| 10    | C <sub>21</sub> H <sub>22</sub> O <sub>5</sub>                        | 71.17  | 71.14 | 6.26   | 6.26  | 22.57  | 22.44 |
| 11    | C <sub>22</sub> H <sub>24</sub> O <sub>5</sub> ·1/8H <sub>2</sub> O   | 71.28  | 71.14 | 6.59   | 6.54  | -      | -     |
| 12    | C <sub>23</sub> H <sub>26</sub> O <sub>5</sub> ·1/8H <sub>2</sub> O   | 71.81  | 71.65 | 6.88   | 6.77  | 21.31  | 21.01 |
| 13    | C <sub>24</sub> H <sub>28</sub> O <sub>5</sub>                        | 72.70  | 72.49 | 7.12   | 7.18  | -      | -     |
| 14    | C <sub>22</sub> H <sub>21</sub> F <sub>3</sub> O <sub>5</sub>         | 62.56  | 62.56 | 5.01   | 4.86  | 18.94  | 19.04 |
| 15    | C <sub>22</sub> H <sub>24</sub> O <sub>4</sub> S·1/8H <sub>2</sub> O  | 68.32  | 68.09 | 6.32   | 6.11  | -      | -     |
| 16    | C <sub>21</sub> H <sub>21</sub> BrO <sub>4</sub>                      | 60.44  | 60.57 | 5.07   | 5.13  | 15.34  | 15.08 |
| 17    | C <sub>21</sub> H <sub>21</sub> FO <sub>4</sub>                       | 70.77  | 70.61 | 5.94   | 5.82  | 17.96  | 17.74 |
| 18    | C <sub>22</sub> H <sub>23</sub> BrO <sub>4</sub>                      | 61.26  | 61.17 | 5.37   | 5.28  | 14.84  | 14.99 |
| 19    | C <sub>23</sub> H <sub>26</sub> O <sub>5</sub>                        | 72.23  | 72.03 | 6.85   | 6.83  | 20.92  | 20.75 |
| 20    | C <sub>22</sub> H <sub>24</sub> O <sub>4</sub>                        | 74.98  | 74.90 | 6.86   | 6.89  | 18.16  | 18.27 |
| 21    | C <sub>22</sub> H <sub>21</sub> F <sub>3</sub> O <sub>4</sub>         | 65.02  | 64.84 | 5.21   | 5.02  | 15.75  | 15.93 |
| 22    | C <sub>22</sub> H <sub>24</sub> O                                     | 71.72  | 71.60 | 6.57   | 6.65  | -      | -     |
| 23    | C <sub>22</sub> H <sub>21</sub> F <sub>3</sub> O <sub>5</sub>         | 62.56  | 62.64 | 5.01   | 4.91  | 18.94  | 19.13 |
| 24    | C <sub>21</sub> H <sub>21</sub> FO <sub>4</sub>                       | 70.77  | 70.59 | 5.94   | 5.98  | -      | -     |
| 26    | C <sub>22</sub> H <sub>21</sub> F <sub>3</sub> O <sub>4</sub>         | 65.02  | 64.73 | 5.21   | 4.96  | 15.75  | 16.04 |
| 27    | C <sub>22</sub> H <sub>24</sub> O <sub>5</sub>                        | 71.72  | 71.69 | 6.57   | 6.51  | 21.71  | 21.72 |
| 28    | C <sub>21</sub> H <sub>21</sub> FO <sub>4</sub>                       | 70.77  | 70.67 | 5.94   | 5.96  | 17.96  | 17.91 |
| 29    | C <sub>23</sub> H <sub>26</sub> O <sub>4</sub>                        | 75.38  | 75.54 | 7.15   | 6.99  | 17.46  | 17.71 |
| 30    | C <sub>23</sub> H <sub>26</sub> O <sub>4</sub>                        | 75.38  | 75.10 | 7.15   | 7.13  | 17.86  | 17.31 |
| 31    | C <sub>22</sub> H <sub>23</sub> ClO <sub>4</sub>                      | 68.30  | 68.03 | 5.99   | 5.89  | 16.54  | 16.54 |
| 32    | C <sub>22</sub> H <sub>23</sub> FO <sub>4</sub> ·1/16H <sub>2</sub> O | 71.12  | 70.91 | 6.27   | 6.16  | 17.49  | 17.10 |
| 33    | C <sub>24</sub> H <sub>28</sub> O <sub>4</sub>                        | 75.76  | 75.62 | 7.42   | 7.41  | 16.82  | 16.95 |
| 34    | C <sub>23</sub> H <sub>26</sub> O <sub>5</sub>                        | 72.23  | 72.29 | 6.85   | 6.89  | 20.92  | 20.75 |
| 35    | C <sub>23</sub> H <sub>26</sub> O <sub>5</sub>                        | 72.23  | 72.29 | 6.85   | 6.82  | 20.92  | 20.90 |

|    |                                   |       |       |      |      |       |       |
|----|-----------------------------------|-------|-------|------|------|-------|-------|
| 36 | $C_{23}H_{26}O_6$                 | 69.33 | 69.33 | 6.58 | 6.54 | 24.09 | 23.95 |
| 37 | $C_{22}H_{23}FO_5$                | 68.38 | 68.28 | 6.00 | 5.97 | 20.70 | 20.60 |
| 38 | $C_{22}H_{23}ClO_5$               | 65.59 | 65.65 | 5.75 | 5.72 | 19.86 | 19.92 |
| 39 | $C_{24}H_{28}O_5$                 | 72.70 | 72.49 | 7.12 | 7.21 | 20.18 | 19.96 |
| 40 | $C_{24}H_{28}O_5$                 | 72.70 | 72.41 | 7.12 | 7.14 | 20.18 | 20.00 |
| 41 | $C_{24}H_{28}O_7$                 | 67.28 | 67.17 | 6.59 | 6.44 | -     | -     |
| 42 | $C_{24}H_{28}O_7$                 | 67.28 | 67.30 | 6.59 | 6.74 | 26.14 | 25.93 |
| 43 | $C_{23}H_{25}ClO_6 \cdot 1/2H_2O$ | 61.51 | 61.32 | 5.93 | 5.58 | -     | -     |
| 44 | $C_{21}H_{22}O_6$                 | 68.10 | 67.56 | 5.99 | 5.94 | -     | -     |
| 45 | $C_{23}H_{26}O_5 \cdot 1/8H_2O$   | 71.81 | 71.61 | 6.88 | 6.97 | -     | -     |
| 46 | $C_{23}H_{26}O_5$                 | 72.23 | 72.53 | 6.85 | 6.94 | 20.92 | 20.74 |
| 47 | $C_{23}H_{26}O_4$                 | 75.38 | 75.48 | 7.15 | 7.18 | 17.46 | 17.30 |
| 48 | $C_{23}H_{26}O_4$                 | 75.38 | 75.10 | 7.15 | 7.16 | 17.46 | 17.40 |
| 49 | $C_{23}H_{26}O_4$                 | 75.38 | 75.59 | 7.15 | 7.16 | 17.46 | 17.54 |
| 50 | $C_{23}H_{26}O_6$                 | 69.33 | 69.34 | 6.58 | 6.74 | 24.09 | 24.08 |
| 51 | $C_{23}H_{26}O_6$                 | 69.33 | 68.81 | 6.58 | 6.49 | 24.09 | 24.18 |
| 52 | $C_{23}H_{26}O_6$                 | 69.33 | 69.13 | 6.58 | 6.44 | 24.09 | 24.20 |
| 53 | $C_{25}H_{30}O_6$                 | 70.40 | 70.70 | 7.09 | 7.25 | -     | -     |
| 54 | $C_{22}H_{23}FO_4$                | 71.34 | 71.52 | 6.26 | 6.26 | 17.28 | 17.00 |
| 55 | $C_{22}H_{23}FO_4$                | 71.34 | 71.42 | 6.26 | 6.17 | 17.28 | 17.34 |
